# Supplementary material for: Crystal plane-dependent gas-sensing properties of zinc oxide nanostructures: experimental and theoretical studies
Source: Royal Society of Chemistry journal article supplement (doi:10.1039/c4cp01279h), 2014-01-01
Supplement: c4cp01279h1.pdf [file c4cp01279h1.pdf]

## Supporting Information

### Crystal Plane-Dependent Gas-Sensing Properties of Zinc Oxide

#### Nanostructures: Experimental and Theoretical Studies

Yusuf V. Kaneti,<sup>a</sup> Zhengjie Zhang,<sup>a</sup> Jeffrey Yue,<sup>b</sup> Quadir M.D. Zakaria,<sup>a</sup> Chuyang Chen,<sup>a</sup>

Xuchuan Jiang,<sup>a,\*</sup> and Aibing Yu<sup>a</sup>

<sup>a</sup>*School of Materials Science and Engineering, The University of New South Wales, Sydney  
NSW 2052, Australia*

<sup>b</sup>*Department of Chemical Engineering, University College London, Torrington Place,  
London WC1E 7JE, United Kingdom.*

#### List of supporting figures:

##### *Gas-Sensing Measurement Diagram*

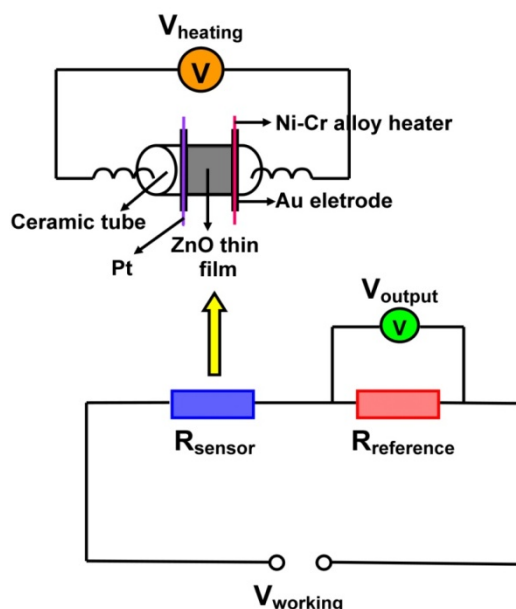

**Fig. S1** Schematic diagram of the WS-30A gas-sensing measurement system

\* To whom correspondence should be addressed. Email: xcjiang@unsw.edu.au. Tel: +61-2-9385 5918.

## *Static State Gas-Distribution Method*

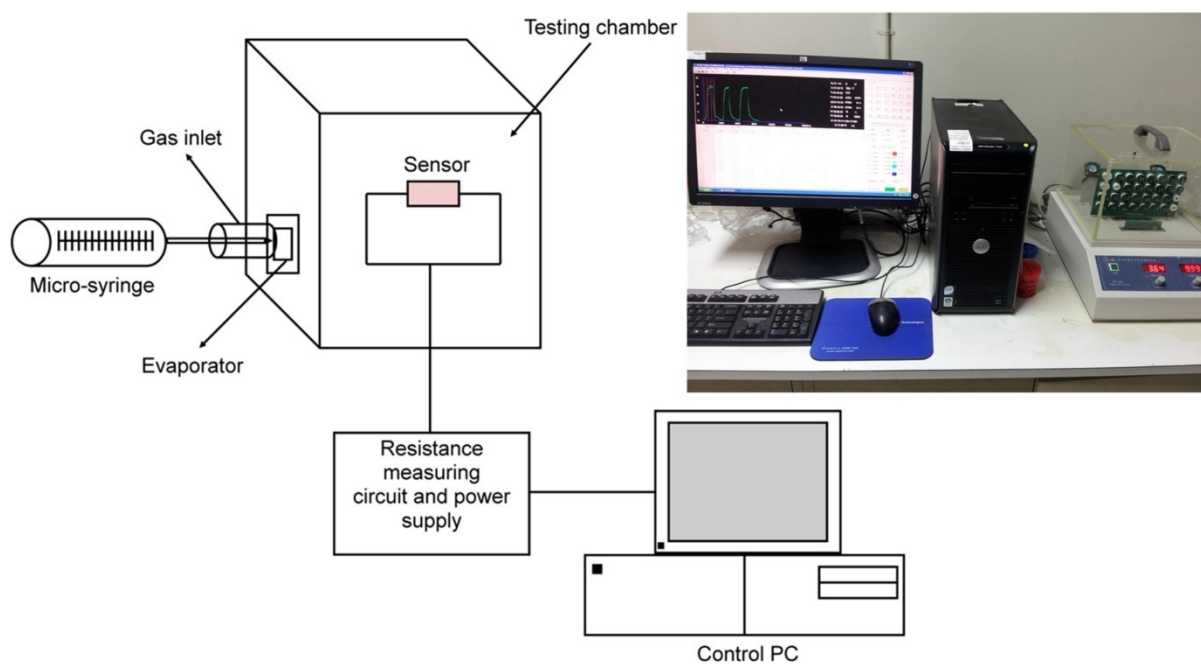

**Fig. S2** Schematic diagram of the static state gas-distribution method used for the gas-sensing measurements.

## *Sensor Pictures*

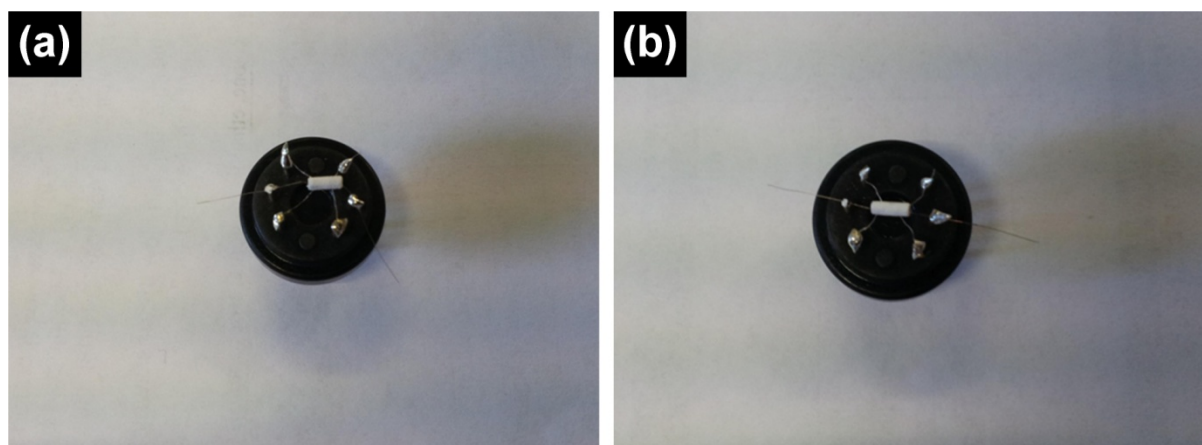

**Fig. S3** Digital photograph of the sensor prepared from: (a) ZnO nanoplates, and (b) ZnO nanorods.

## XPS Analysis

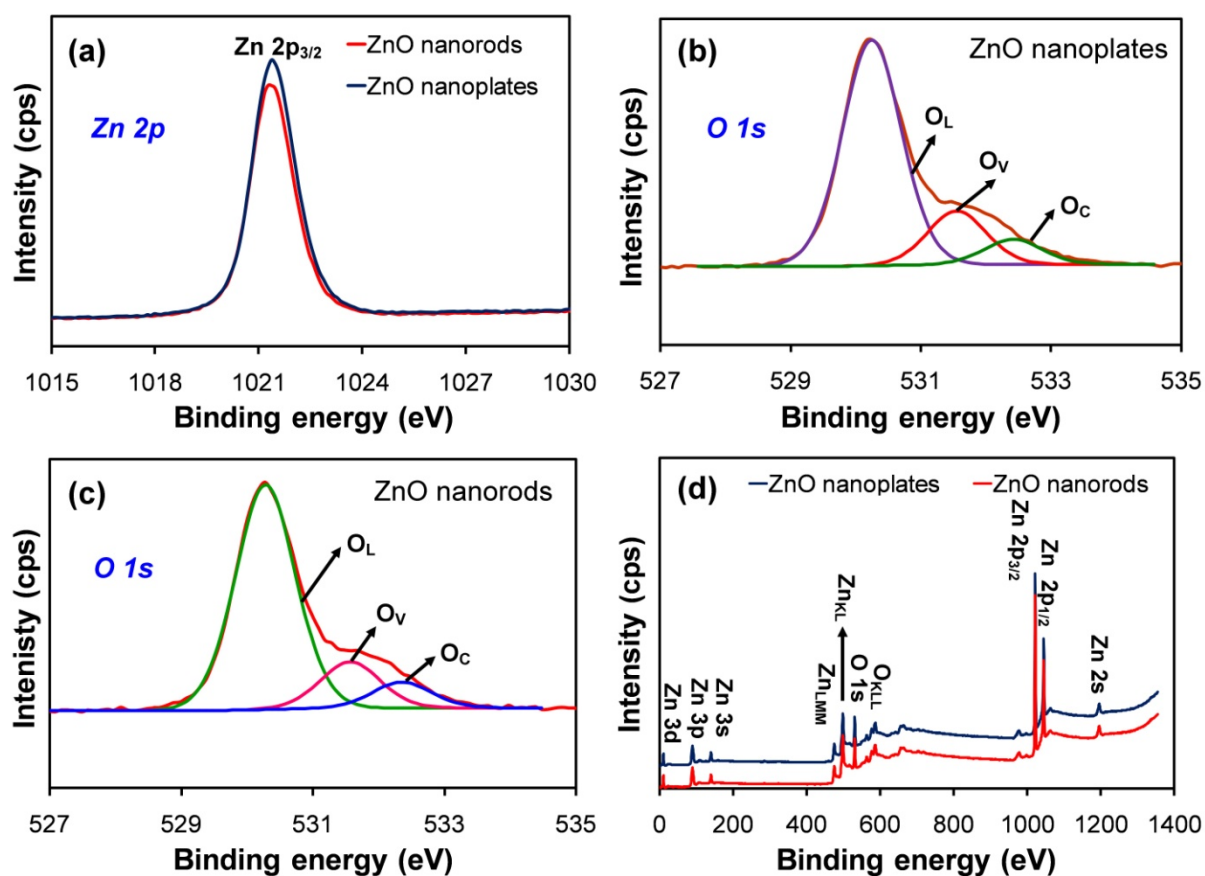

**Fig. S4** (a) Zn 2p XPS spectra of ZnO nanorods and nanoplates; O 1s XPS spectra of: (b) ZnO nanoplates, (c) ZnO nanorods; (d) survey spectra of ZnO nanoplates and nanorods.
